# Supplementary material for: Bioactivity-guided mixed synthesis and evaluation of α-alkenyl-γ and δ-lactone derivatives as potential fungicidal agents
Source: Royal Society of Chemistry journal article supplement (doi:10.1039/c7ra12471f), 2017-01-01
Supplement: c7ra12471f1.pdf [file c7ra12471f1.pdf]

Electronic supplementary information (ESI)

## **Bioactivity-guided mixed synthesis and evaluation of $\alpha$ -alkenyl- $\gamma$ and $\delta$ -lactone derivatives as potential fungicidal agents**

### **Authorship:**

Authors: Yong-Ling Wu <sup>a</sup>, Yan-Qing Gao <sup>a, b</sup>, De-Long Wang <sup>a</sup>, Chen-Quan Zhong <sup>a</sup>,  
Jun-Tao Feng <sup>a, b, \*</sup>, Xing Zhang <sup>a, b</sup>

<sup>a</sup> Research and Development Center of Biorational Pesticide, Northwest A&F University, Yangling 712100, Shaanxi, China.

<sup>b</sup> Research Center of Biopesticide Technology & Engineering, Shaanxi Province, Yangling 712100, Shaanxi, China.

\*Corresponding Author: Telephone +86-29-87092122; fax +86-29-87092122; E-Mail:  
[fengjt@nwsuaf.edu.cn](mailto:fengjt@nwsuaf.edu.cn)

### Supplementary content:

|                                                                                                 |    |
|-------------------------------------------------------------------------------------------------|----|
| The difference between the experimental pIC <sub>50</sub> and predicted pIC <sub>50</sub> ..... | S2 |
| The Five Significant Descriptors and Their Values.....                                          | S3 |
| The figure of Experimental pIC <sub>50</sub> vs. predicted pIC <sub>50</sub> .....              | S4 |
| The figure of “breaking point” rule results.....                                                | S5 |
| The Internal validation of the QSAR model.....                                                  | S5 |

Table 1 The difference between the experimental pIC<sub>50</sub> and predicted pIC<sub>50</sub>

| No. | Compd. | Calc.pIC <sub>50</sub> | Exp.pIC <sub>50</sub> | Difference |
|-----|--------|------------------------|-----------------------|------------|
| 1   | 2-1    | -1.9479                | -1.9775               | 0.0296     |
| 2   | 2-2    | -1.7686                | -1.8028               | 0.0342     |
| 3   | 2-3    | -1.8142                | -1.7002               | -0.1140    |
| 4   | 2-4    | -1.6175                | -1.6664               | 0.0489     |
| 5   | 2-5    | -1.7616                | -1.7839               | 0.0223     |
| 6   | 2-6    | -1.7348                | -1.7674               | 0.0326     |
| 7   | 2-7    | -1.6315                | -1.7069               | 0.0754     |
| 8   | 2-8    | -1.6456                | -1.6929               | 0.0473     |
| 9   | 2-9    | -1.5657                | -1.5940               | 0.0283     |
| 10  | 2-10   | -1.3724                | -1.4522               | 0.0798     |
| 11  | 2-11   | -2.0678                | -2.1337               | 0.0659     |
| 12  | 2-12   | -2.1999                | -2.1053               | -0.0946    |
| 13  | 2-13   | -2.0557                | -2.0323               | -0.0234    |
| 14  | 2-14   | -2.2269                | -2.1622               | -0.0647    |
| 15  | 2-15   | -1.9646                | -2.1412               | 0.1766     |
| 16  | 2-16   | -2.0651                | -2.1193               | 0.0543     |
| 17  | 2-17   | -1.2719                | -1.3354               | 0.0635     |
| 18  | 2-18   | -1.7079                | -1.7625               | 0.0546     |
| 19  | 2-19   | -1.6878                | -1.6003               | -0.0875    |
| 20  | 2-20   | -1.8744                | -2.0286               | 0.1542     |
| 21  | 2-21   | -1.5656                | -1.6311               | 0.0655     |
| 22  | 2-22   | -2.1516                | -2.0557               | -0.0959    |
| 23  | 2-23   | -2.0414                | -2.1632               | 0.1218     |
| 24  | 2-24   | -2.0278                | -2.1821               | 0.1543     |
| 25  | 2-25   | -1.6990                | -1.6205               | -0.0785    |
| 26  | 2-26   | -1.2919                | -1.3246               | 0.0327     |
| 27  | 4-1    | -2.0030                | -2.0765               | 0.0735     |
| 28  | 4-2    | -1.8180                | -1.9144               | 0.0964     |
| 29  | 4-3    | -1.9468                | -1.8976               | -0.0492    |
| 30  | 4-4    | -1.7283                | -1.8224               | 0.0941     |
| 31  | 4-5    | -2.0024                | -1.9221               | -0.0803    |
| 32  | 4-6    | -1.8319                | -1.8947               | 0.0628     |
| 33  | 4-7    | -1.7416                | -1.8458               | 0.1042     |
| 34  | 4-8    | -1.7251                | -1.9022               | 0.1771     |
| 35  | 4-9    | -1.9077                | -1.8713               | -0.0364    |
| 36  | 4-10   | -1.7670                | -1.8246               | 0.0576     |
| 37  | 4-11   | -2.1249                | -2.2186               | 0.0937     |
| 38  | 4-12   | -2.0920                | -2.1681               | 0.0761     |
| 39  | 4-13   | -2.0899                | -2.1148               | 0.0249     |
| 40  | 4-14   | -2.2785                | -2.2436               | -0.0349    |
| 41  | 4-15   | -2.3222                | -2.2384               | -0.0838    |

|    |      |         |         |         |
|----|------|---------|---------|---------|
| 42 | 4-16 | -2.1799 | -2.1855 | 0.0056  |
| 43 | 4-17 | -1.8136 | -1.7482 | -0.0654 |
| 44 | 4-18 | -1.9157 | -1.9521 | 0.0364  |
| 45 | 4-19 | -1.9388 | -1.7845 | -0.1543 |
| 46 | 4-20 | -2.0554 | -2.1319 | 0.0765  |
| 47 | 4-21 | -1.8564 | -1.8132 | -0.0432 |
| 48 | 4-22 | -2.0028 | -2.1253 | 0.1225  |
| 49 | 4-23 | -2.2382 | -2.2136 | -0.0246 |
| 50 | 4-24 | -2.1793 | -2.2471 | 0.0678  |
| 51 | 4-25 | -1.7391 | -1.8385 | 0.0994  |
| 52 | 4-26 | -1.6430 | -1.6643 | 0.0213  |

Table 2 Fungicidal activity and structural descriptors of the title compounds

| No. | Compd. | pIC <sub>50</sub> | Structural descriptors    |                    |                    |                      |                         |
|-----|--------|-------------------|---------------------------|--------------------|--------------------|----------------------|-------------------------|
|     |        |                   | $q_{\max}^O$ <sup>a</sup> | $n_o$ <sup>b</sup> | MAOEP <sup>c</sup> | $\mu_c$ <sup>d</sup> | $q_{\max}$ <sup>e</sup> |
| 1   | 2-1    | -1.9479           | -0.2470                   | 1.4348             | 1.9118             | 4.8340               | 0.3316                  |
| 2   | 2-2    | -1.7686           | -0.2609                   | 1.5652             | 1.9855             | 4.8610               | 0.2884                  |
| 3   | 2-3    | -1.8142           | -0.2455                   | 1.5652             | 1.9820             | 4.6130               | 0.3309                  |
| 4   | 2-4    | -1.6175           | -0.2455                   | 1.5652             | 1.9820             | 3.6000               | 0.3309                  |
| 5   | 2-5    | -1.7616           | -0.2467                   | 1.5652             | 1.9844             | 4.9890               | 0.3328                  |
| 6   | 2-6    | -1.7348           | -0.2453                   | 1.5652             | 1.9667             | 4.5830               | 0.3309                  |
| 7   | 2-7    | -1.6315           | -0.2450                   | 1.5652             | 1.9730             | 3.9350               | 0.3305                  |
| 8   | 2-8    | -1.6456           | -0.2462                   | 1.5652             | 1.9576             | 5.2870               | 0.3321                  |
| 9   | 2-9    | -1.5657           | -0.2452                   | 1.5652             | 1.9433             | 4.6340               | 0.3307                  |
| 10  | 2-10   | -1.3724           | -0.2455                   | 1.5652             | 1.9376             | 3.2410               | 0.3312                  |
| 11  | 2-11   | -2.0678           | -0.2476                   | 1.3846             | 1.9118             | 4.5690               | 0.3322                  |
| 12  | 2-12   | -2.1999           | -0.2473                   | 1.3846             | 1.9118             | 4.9560               | 0.3317                  |
| 13  | 2-13   | -2.0557           | -0.2474                   | 1.3846             | 1.9118             | 5.2420               | 0.3318                  |
| 14  | 2-14   | -2.2269           | -0.2062                   | 1.4444             | 1.9118             | 5.0240               | 0.3325                  |
| 15  | 2-15   | -1.9646           | -0.2083                   | 1.4444             | 1.9117             | 5.6670               | 0.3314                  |
| 16  | 2-16   | -2.0651           | -0.2062                   | 1.4444             | 1.9118             | 5.0240               | 0.3325                  |
| 17  | 2-17   | -1.2719           | -0.2432                   | 1.7308             | 1.9615             | 2.0340               | 0.4656                  |
| 18  | 2-18   | -1.7079           | -0.2471                   | 1.4483             | 1.9118             | 4.7400               | 0.3323                  |
| 19  | 2-19   | -1.6878           | -0.2518                   | 1.4444             | 1.9113             | 4.9390               | 0.3427                  |
| 20  | 2-20   | -1.8744           | -0.2437                   | 1.5417             | 1.9118             | 2.4280               | 0.3299                  |
| 21  | 2-21   | -1.5656           | -0.2453                   | 1.6957             | 1.9822             | 4.2240               | 0.3319                  |
| 22  | 2-22   | -2.1516           | -0.1015                   | 1.5500             | 1.9118             | 4.8100               | 0.3337                  |
| 23  | 2-23   | -2.0414           | -0.2474                   | 1.3448             | 1.9118             | 5.2710               | 0.3318                  |
| 24  | 2-24   | -2.0278           | -0.2475                   | 1.3125             | 1.9118             | 5.2800               | 0.3318                  |
| 25  | 2-25   | -1.6990           | -0.2469                   | 1.3448             | 1.9118             | 5.1390               | 0.3301                  |
| 26  | 2-26   | -1.2919           | -0.2444                   | 1.4483             | 1.9674             | 4.7630               | 0.3311                  |
| 27  | 4-1    | -2.0030           | -0.2584                   | 1.3846             | 1.9129             | 3.5750               | 0.3456                  |
| 28  | 4-2    | -1.8180           | -0.2453                   | 1.5000             | 1.9820             | 2.6530               | 0.3436                  |

|    |      |         |         |        |        |        |        |
|----|------|---------|---------|--------|--------|--------|--------|
| 29 | 4-3  | -1.9468 | -0.2559 | 1.5000 | 1.9820 | 4.7240 | 0.3422 |
| 30 | 4-4  | -1.7283 | -0.2562 | 1.5000 | 1.9819 | 4.5660 | 0.3445 |
| 31 | 4-5  | -2.0024 | -0.2554 | 1.5000 | 1.9665 | 3.1570 | 0.3430 |
| 32 | 4-6  | -1.8319 | -0.2554 | 1.5000 | 1.9663 | 4.3290 | 0.3417 |
| 33 | 4-7  | -1.7416 | -0.2558 | 1.5000 | 1.9829 | 4.2620 | 0.3439 |
| 34 | 4-8  | -1.7251 | -0.2467 | 1.5000 | 1.9331 | 5.7840 | 0.3348 |
| 35 | 4-9  | -1.9077 | -0.2557 | 1.5000 | 1.9534 | 5.1480 | 0.3421 |
| 36 | 4-10 | -1.7670 | -0.2561 | 1.5000 | 1.9126 | 4.8890 | 0.3451 |
| 37 | 4-11 | -2.1249 | -0.2477 | 1.3448 | 1.9129 | 3.9210 | 0.3452 |
| 38 | 4-12 | -2.0920 | -0.2589 | 1.3448 | 1.9129 | 3.2820 | 0.3461 |
| 39 | 4-13 | -2.0899 | -0.2588 | 1.3448 | 1.9129 | 3.3720 | 0.3461 |
| 40 | 4-14 | -2.2785 | -0.2166 | 1.4000 | 1.9125 | 4.0690 | 0.3480 |
| 41 | 4-15 | -2.3222 | -0.2047 | 1.4000 | 1.9131 | 3.2420 | 0.3418 |
| 42 | 4-16 | -2.1799 | -0.2073 | 1.4000 | 1.9129 | 4.0620 | 0.3466 |
| 43 | 4-17 | -1.8136 | -0.2534 | 1.7308 | 1.9654 | 2.6543 | 0.3765 |
| 44 | 4-18 | -1.9157 | -0.2657 | 1.5203 | 1.9129 | 4.6754 | 0.3543 |
| 45 | 4-19 | -1.9388 | -0.2576 | 1.4062 | 1.9130 | 3.5030 | 0.3452 |
| 46 | 4-20 | -2.0554 | -0.2437 | 1.5417 | 1.9118 | 2.4280 | 0.3299 |
| 47 | 4-21 | -1.8564 | -0.2434 | 1.6154 | 1.9821 | 3.6590 | 0.3425 |
| 48 | 4-22 | -2.0028 | -0.1179 | 1.4783 | 1.9127 | 3.1270 | 0.3494 |
| 49 | 4-23 | -2.2382 | -0.2590 | 1.3125 | 1.9129 | 3.3040 | 0.3462 |
| 50 | 4-24 | -2.1793 | -0.2589 | 1.2857 | 1.9129 | 3.3660 | 0.3461 |
| 51 | 4-25 | -1.7391 | -0.2567 | 1.3333 | 1.9126 | 3.6630 | 0.3499 |
| 52 | 4-26 | -1.6430 | -0.2439 | 1.4242 | 1.9672 | 3.1860 | 0.3470 |

Note: <sup>a</sup> Max. net atomic charge for a O atom. <sup>b</sup> Number of occupied electronic levels of atoms. <sup>c</sup> Max. atomic orbital electronic population. <sup>d</sup> Total point-charge composition of the molecular dipole. <sup>e</sup> Max. net atomic charge.

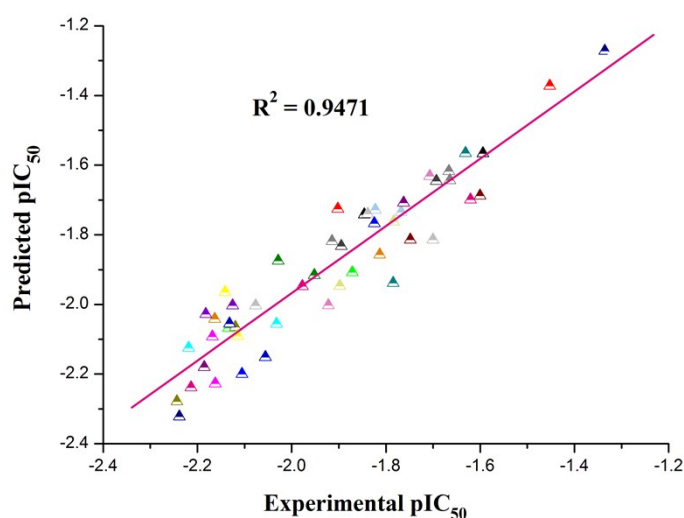

**Fig. 1** Experimental pIC<sub>50</sub> vs. predicted pIC<sub>50</sub>.

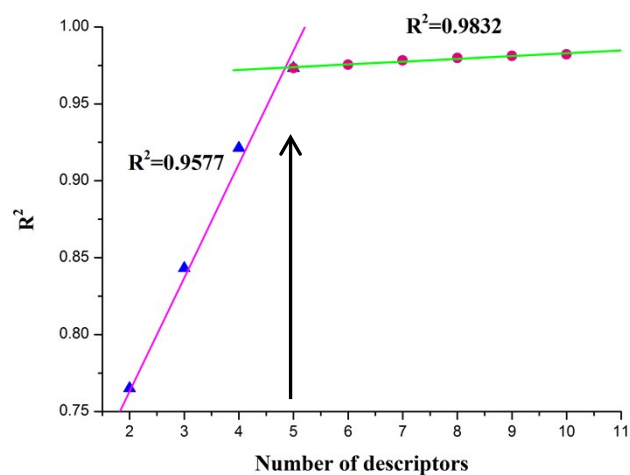

**Fig. 2** The “breaking point” rule results  
**Table 3** Internal validation of the QSAR model <sup>a</sup>

| Training set | <i>N</i> | <i>R</i> <sup>2</sup> | <i>F</i> | <i>S</i> <sup>2</sup> | Test set | <i>N</i> | <i>R</i> <sup>2</sup> | <i>F</i> | <i>S</i> <sup>2</sup> |
|--------------|----------|-----------------------|----------|-----------------------|----------|----------|-----------------------|----------|-----------------------|
| A+B          | 34       | 0.954                 | 65.79    | 0.0031                | C        | 18       | 0.945                 | 64.54    | 0.0026                |
| B+C          | 35       | 0.932                 | 64.34    | 0.0029                | A        | 17       | 0.932                 | 65.22    | 0.0031                |
| A+C          | 35       | 0.945                 | 65.54    | 0.0027                | B        | 17       | 0.944                 | 64.99    | 0.0032                |
| Average      |          | 0.943                 | 65.22    | 0.0029                | Average  |          | 0.941                 | 64.92    | 0.0030                |

Note: <sup>a</sup>Compds. A: 1, 4, 7, 10, 13, 16, 19, 22, 25, 28, 31, 34, 37, 40, 43, 46, 49, 52. Compds. B: 2, 5, 8, 11, 14, 17, 20, 23, 26, 29, 32, 35, 38, 41, 44, 47, 50. Compds. C: 3, 6, 9, 12, 15, 18, 21, 24, 27, 30, 33, 36, 39, 42, 45, 48, 51.
